# Supplementary material
Source: Springer Nature journal article supplement (https://www.springermedizin.de/resource/supplementary/12865_2012_532_MOESM4_ESM.pdf/9428148)

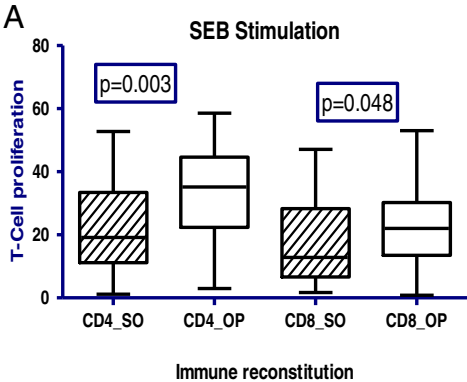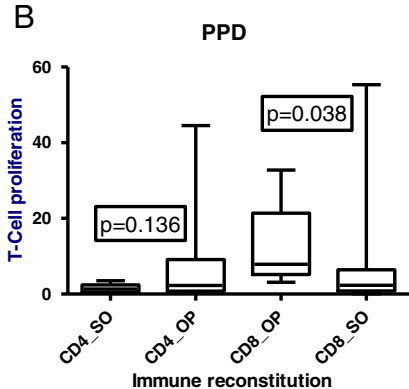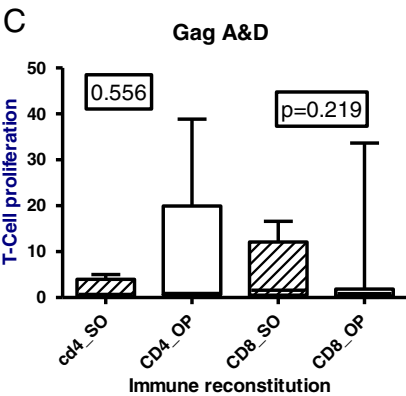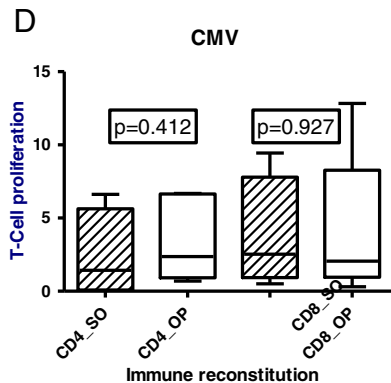

Supplement: MOESM4 [file 9428148]
